# Supplementary material for: MgTeMoO6: A neutral layered material showing strong second-harmonic generation
Source: Royal Society of Chemistry journal article supplement (doi:10.1039/c2jm30953j), 2012-01-01
Supplement: c2jm30953j.pdf [file c2jm30953j.pdf]

Supporting Information for:

## **MgTeMoO<sub>6</sub>: A Neutral Layered Material Showing Strong Second-harmonic Generation**

Junjie Zhang, Zhonghan Zhang, Youxuan Sun, Chengqian Zhang, Shaojun Zhang,

Yang Liu, Xutang Tao\*

State Key Laboratory of Crystal Materials, Shandong University, Jinan 250100,

Shandong, China

[txt@icm.sdu.edu.cn](mailto:txt@icm.sdu.edu.cn)

**Table S1.** Atomic coordinates ( $\times 10^4$ ) and equivalent isotropic displacement parameters ( $\text{\AA}^2 \times 10^3$ ) for MgTeMoO<sub>6</sub>.

**Fig. S1.** Powder X-ray diffraction pattern of the residue of MgTeMoO<sub>6</sub> after differential scanning calorimetry and thermogravimetric analysis measurements.

**Fig. S2.** The theoretical morphology of MgTeMoO<sub>6</sub> established by using the Mercury program with its structural parameters according to the Bravais-Friedel and Donnay-Harker (BFDH) methods.

**Table S1.** Atomic coordinates ( $\times 10^4$ ) and equivalent isotropic displacement parameters ( $\text{\AA}^2 \times 10^3$ ) for  $\text{MgTeMoO}_6$ .  $U(\text{eq})$  is defined as one third of the trace of the orthogonalized  $U_{ij}$  tensor.

| <b>Atom</b> | <b>x</b> | <b>y</b> | <b>z</b> | <b>U(eq)</b> |
|-------------|----------|----------|----------|--------------|
| Te          | 0        | 0        | 2433(1)  | 7(1)         |
| Mo          | 0        | 0        | 6913(1)  | 8(1)         |
| Mg          | 0        | 5000     | 309(2)   | 9(1)         |
| O(1)        | 2219(5)  | 1697(5)  | 1058(3)  | 11(1)        |
| O(2)        | 2351(5)  | 6741(6)  | 2052(3)  | 11(1)        |
| O(3)        | 3539(6)  | 2854(5)  | 4250(3)  | 15(1)        |

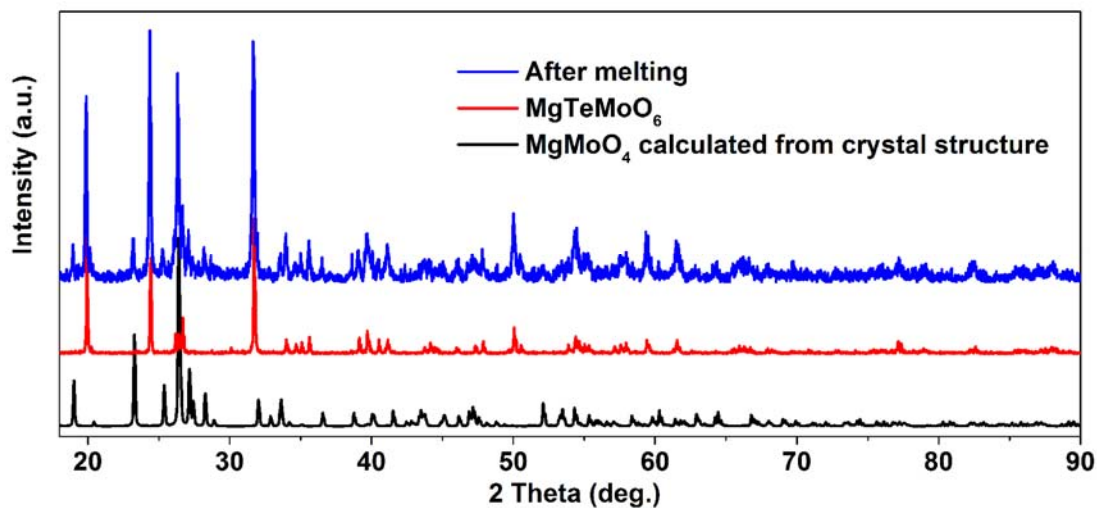

**Fig. S1.** Powder X-ray diffraction pattern of the residue of MgTeMoO<sub>6</sub> after differential scanning calorimetry and thermogravimetric analysis measurements.

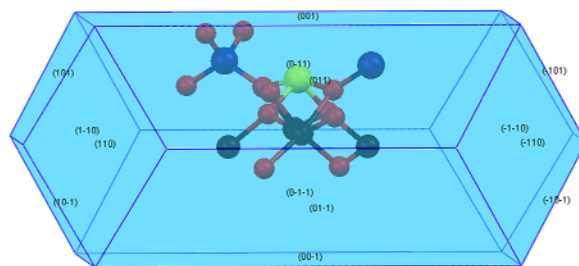

**Fig. S2.** The theoretical morphology of MgTeMoO<sub>6</sub> established by using the Mercury program with its structural parameters according to the Bravais-Friedel and Donnay-Harker (BFDH) methods.
